# Supplementary material for: Identification and functional analysis of a new putative caveolin-3 variant found in a patient with sudden unexplained death
Source: PubMed Central journal article supplement (PMC4109384; doi:10.1186/1423-0127-21-58), 2014-06-10
Supplement: 1423-0127-21-58-S2.pdf [file 1423-0127-21-58-S2.pdf]

**a**

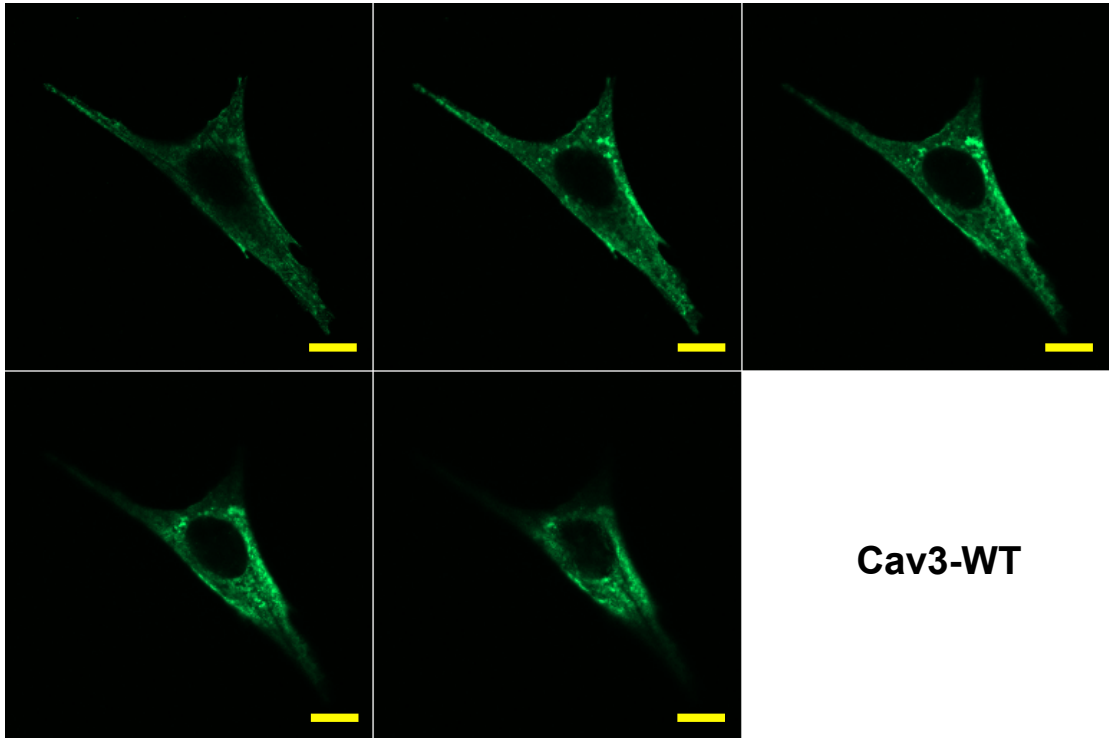

**b**

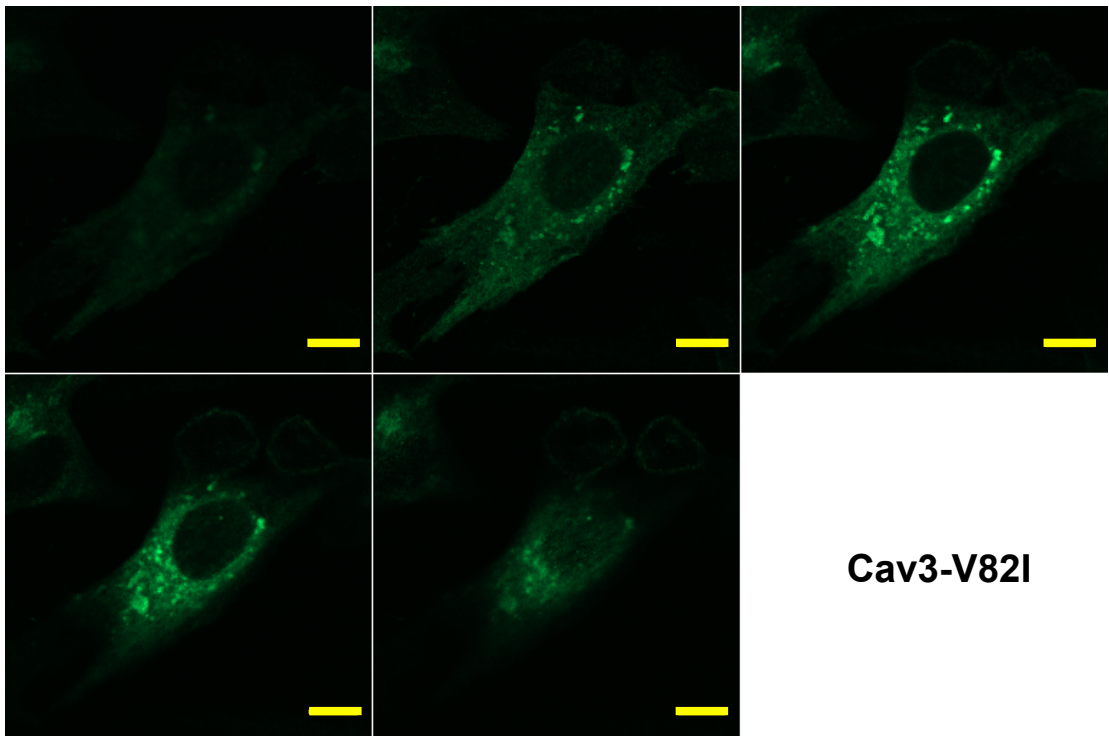

**Fig. S2**
